# Supplementary material
Source: Research Square preprint supplement (doi:10.21203/rs.3.rs-8948634/v1)
Supplement: Supplementary file 1 [file 8c99e7b94724ae15fc839b08.docx]

**Title: A Pan-Biome Metagenomic Atlas of the Brazilian Rhizosphere, Root, and Soil Microbiomes**

Luisa Mayumi Arake de Tacca1, Rayane Nunes Lima1, Patrícia Verdugo Pascoal1, Marco Antônio de Oliveira1, Carlos Alexandre Xavier de Azevedo1, Deborah Bambil1, Paula Mizotte1, Grácia Maria Soares Rosinha1, Daniela Matias de Carvalho Bittencourt1, Ahmed Moustafa7, Diana Signor2, Magna Soelma Beserra de Moura2, José Pedro Pereira Trindade3, Leandro Bochi da Silva Volk3, Fernando Antônio Fernandes4, Ricardo Lopes5, Jean Luiz Simões-Araújo6, Marcelo Freire7,8*, and Elibio Rech1*

1Embrapa Genetic Resources and Biotechnology/National Institute of Science and Technology in Engineering Biological Systems, Brasília, Distrito Federal, Brazil.

2Embrapa Semiarid, Petrolina, Recife, Brazil;

3Embrapa Southern Livestock, Bagé, Rio Grande do Sul, Brazil;

4Embrapa Pantanal, Corumbá, Mato Grosso, Brazil;

5Embrapa Western Amazon, Manaus, Amazonas, Brazil;

6 Embrapa Agrobiology, Seropédica, Rio de Janeiro, Brazil;

7 The J. Craig Venter Institute, La Jolla, California, United States.

8 University of California San Diego, La Jolla, California, United States.

*corresponding authors


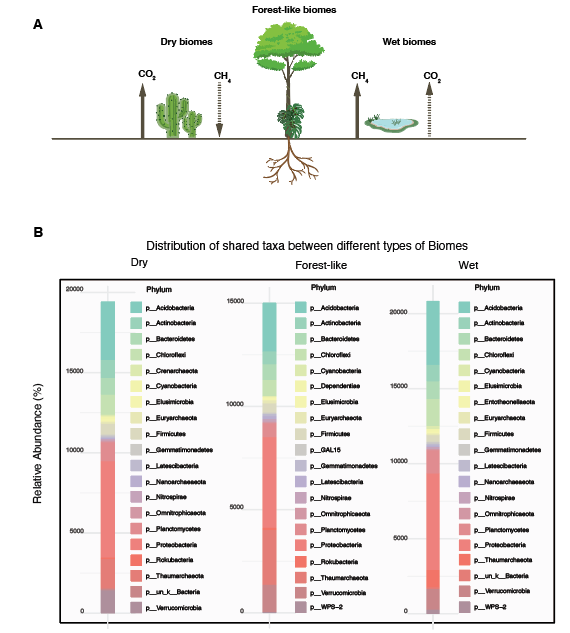


Supplemental figure 1. Differences between dry, wet and forest-like biomes. A. Graphical representation of the three different biome categories. B. Distribution of the shared phylum taxa on their relative abundances for each biome category.
